# Supplementary material for: Comparative Efficacy of Continuous Ceftazidime Infusion vs. Intermittent Bolus against In Vitro Ceftazidime-Susceptible and -Resistant Pseudomonas aeruginosa Biofilm
Source: MDPI journal article supplement (doi:10.3390/antibiotics13040344), 2024-04-09
Supplement: s1 [file s1]

### Supplementary data

**Figure S1.** Representative confocal images of HUB-PAS biofilm before and after treatment.

Control (0h), a; HUB-PAS CAZ-IB (54h), b; HUB-PAS CAZ-CI<sub>50</sub> (54h), c; HUB-PAS CAZ-CI<sub>70</sub> (54h), d.

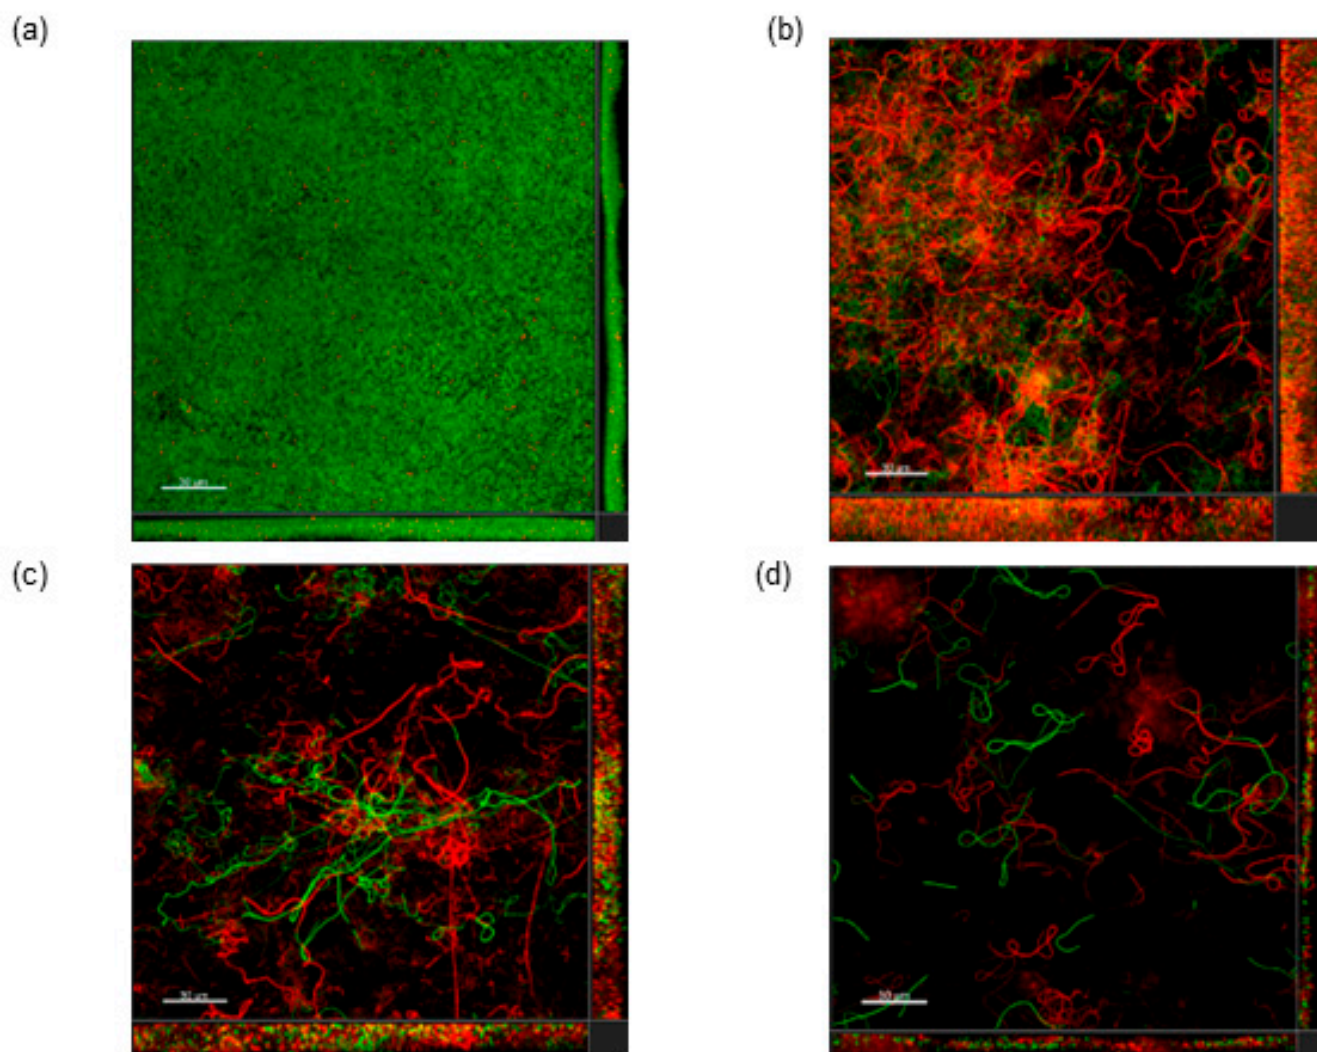

Abbreviations: CAZ, ceftadizime; CI, continuous infusion and IB, intermittent bolus
